# Supplementary material
Source: HighWire-hosted journal article supplement (https://erj.ersjournals.com/content/53/4/1801500)
Supplement: inline-supplementary-material-1 [file inline-supplementary-material-1.pdf]

## Supplementary material

### Dynamic hyperinflation impairs daily life activity in asthma

A. N. van der Meer<sup>1</sup>, K. de Jong<sup>1</sup>, A. Hoekstra-Kuik<sup>1</sup>, E.H. Bel<sup>2</sup>, A. ten Brinke<sup>1</sup>

<sup>1</sup>Medical Centre Leeuwarden - Leeuwarden (Netherlands), <sup>2</sup>Academic Medical Centre - Amsterdam (Netherlands)

**Table S1 Relationship of degree of dynamic hyperinflation with questionnaire scores - total and subdomains**

|                   |                   |
|-------------------|-------------------|
| ACQ               | r= 0.315 p=0.005  |
| CCQ               | r= 0.320 p=0.005  |
| SGRQ              | r= 0.324 p=0.004  |
| LCADL             | r= 0.385 p=0.001  |
| SOBDA             | r=0.228 p=0.046   |
| CCQ, subdomains   |                   |
| Symptoms          | r= 0.245 p= 0.032 |
| Functional state  | r= 0.194 p= 0.091 |
| Mental state      | r= 0.381 p= 0.001 |
| SGRQ, subdomains  |                   |
| Symptoms          | r= 0.287 p= 0.011 |
| Activities        | r= 0.347 p= 0.002 |
| Impact            | r= 0.241 p= 0.034 |
| LCADL, subdomains |                   |
| Self care         | r= 0.362 p= 0.001 |
| Domestic          | r= 0.284 p= 0.012 |
| Physical          | r= 0.193 p= 0.093 |
| Leisure           | r= 0.315 p= 0.005 |

r: correlation coefficient by Spearman rank, with corresponding p-value. Definitions of abbreviations:

ACQ = Asthma Control Questionnaire, CCQ = Clinical COPD Questionnaire, SGRQ = St. George

Respiratory Questionnaire, LCADL = London Chest Activity of Daily Living questionnaire, SOBDA =

Shortness of Breath with Daily Activities questionnaire.

**Table S2 Relationship of FEV<sub>1</sub> and static hyperinflation with questionnaire scores**

|       | <b>FEV<sub>1</sub> %pred</b> | <b>RV/TLC %pred</b> | <b>FRC/TLC %pred</b> |
|-------|------------------------------|---------------------|----------------------|
| ACQ   | r= 0.158 p= 0.169            | r= 0.099 p= 0.393   | r= 0.146 p= 0.204    |
| CCQ   | r= 0.055 p= 0.633            | r= 0.039 p= 0.735   | r= 0.041 p= 0.726    |
| SGRQ  | r= 0.142 p= 0.219            | r= 0.200 p= 0.081   | r= 0.185 p= 0.107    |
| LCADL | r= 0.175 p= 0.128            | r= 0.189 p= 0.104   | r= 0.167 p= 0.148    |
| SOBDA | r= 0.156 p= 0.142            | r=0.254 p= 0.026    | r= 0.284 p= 0.0012   |

r: correlation coefficient by Spearman rank, with corresponding p-value. Definitions of abbreviations: ACQ = Asthma Control Questionnaire, total score, CCQ = Clinical COPD Questionnaire, total score, SGRQ = St. George Respiratory Questionnaire, total score, LCADL = London Chest Activity of Daily Living questionnaire, total score, SOBDA = Shortness of Breath with Daily Activities questionnaire, total score, FEV<sub>1</sub> = forced expiratory volume in one second, FRC = function residual capacity, % pred = percentage of predicted value, RV = residual volume, TLC = total lung capacity.
